# Supplementary material for: Erythropoietin and IGF-1 signaling synchronize cell proliferation and maturation during erythropoiesis
Source: PubMed Central journal article supplement — Genes Dev. 2015 Dec 15;29(24):2603–16. doi: 10.1101/gad.267633.115 (PMC4699388; doi:10.1101/gad.267633.115), 2015-12-15

# Kadri et al Supplemental Figure S1

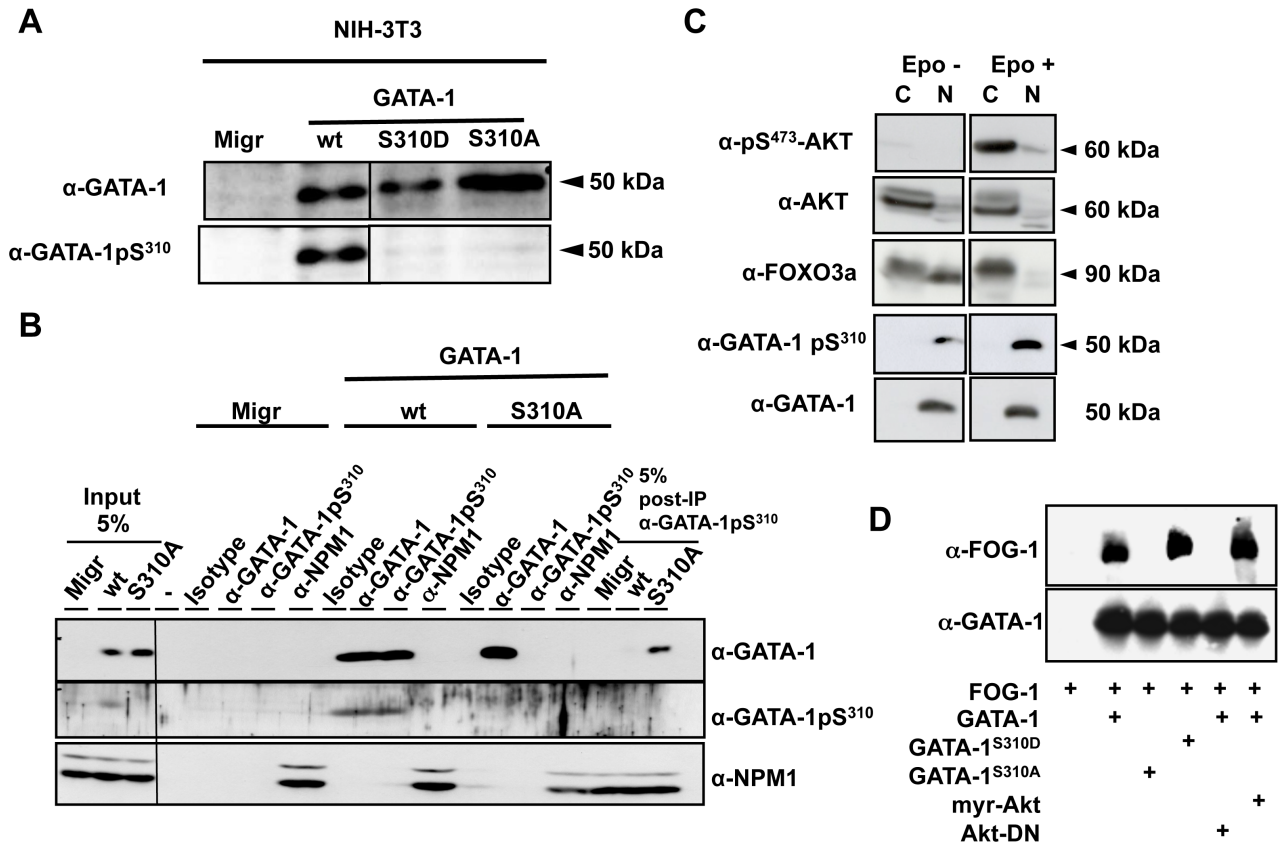

## Kadri et al Supplemental Figure S2

**A**

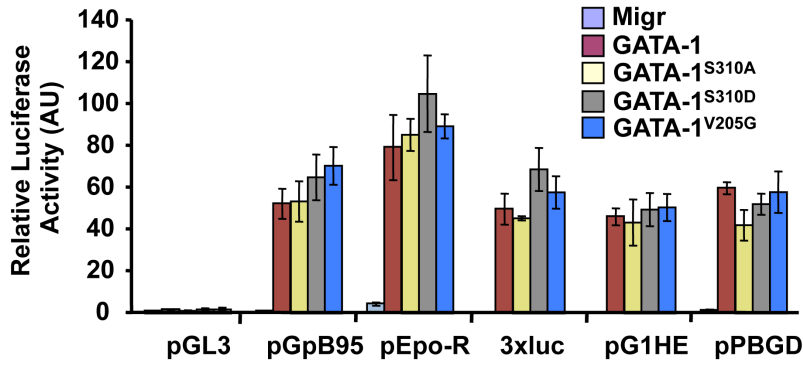

**B**

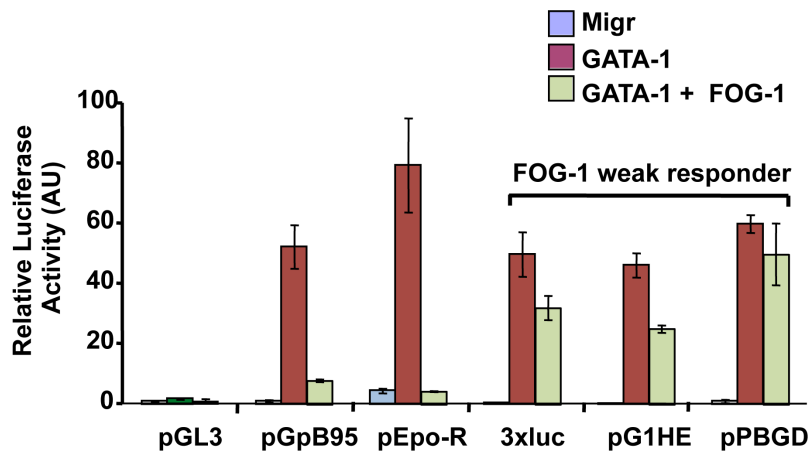

**C**

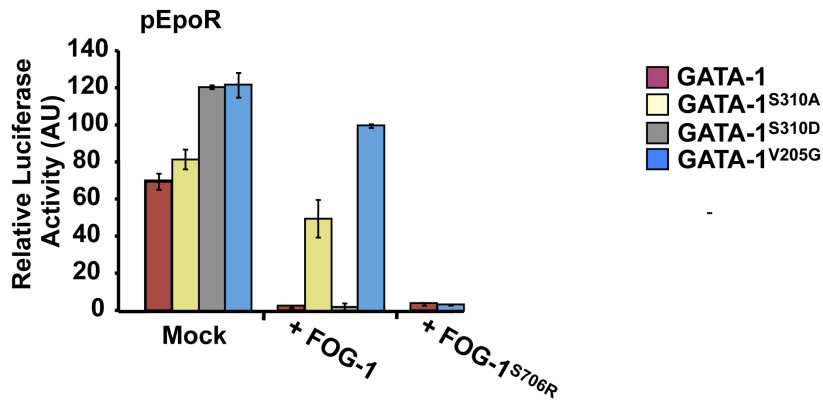

**D**

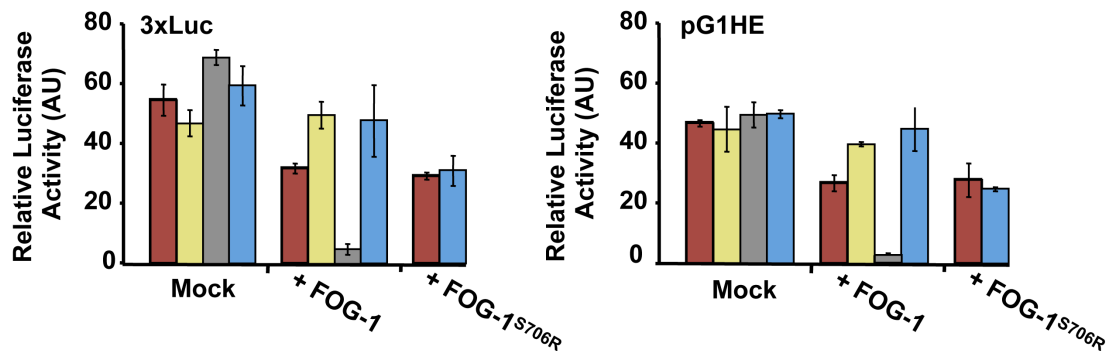

**Kadri et al Supplemental Figure S3**

**A**

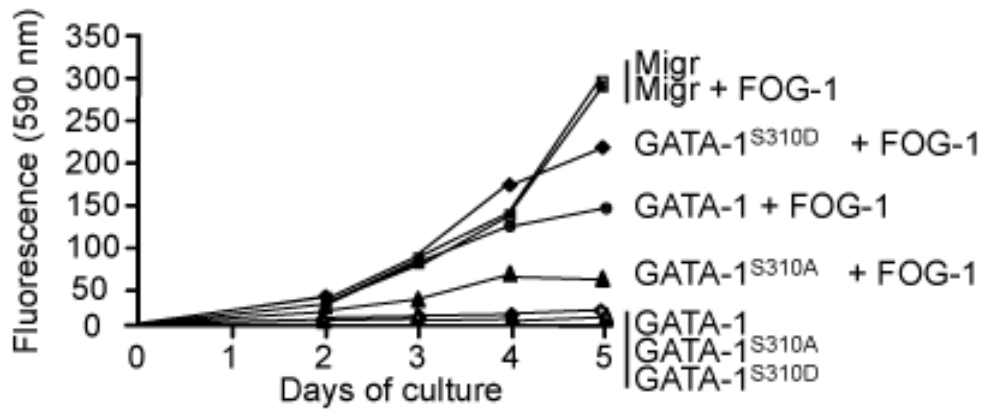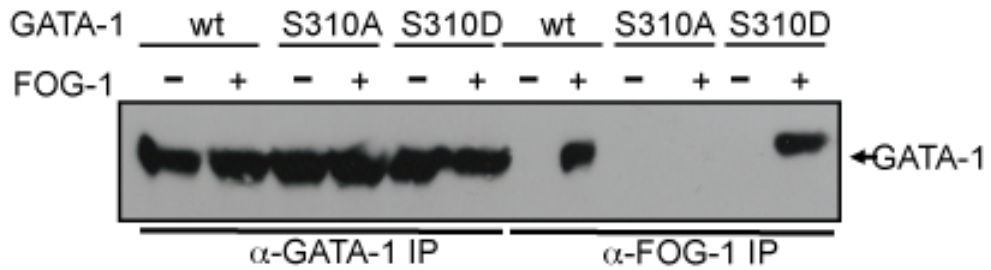

**B**

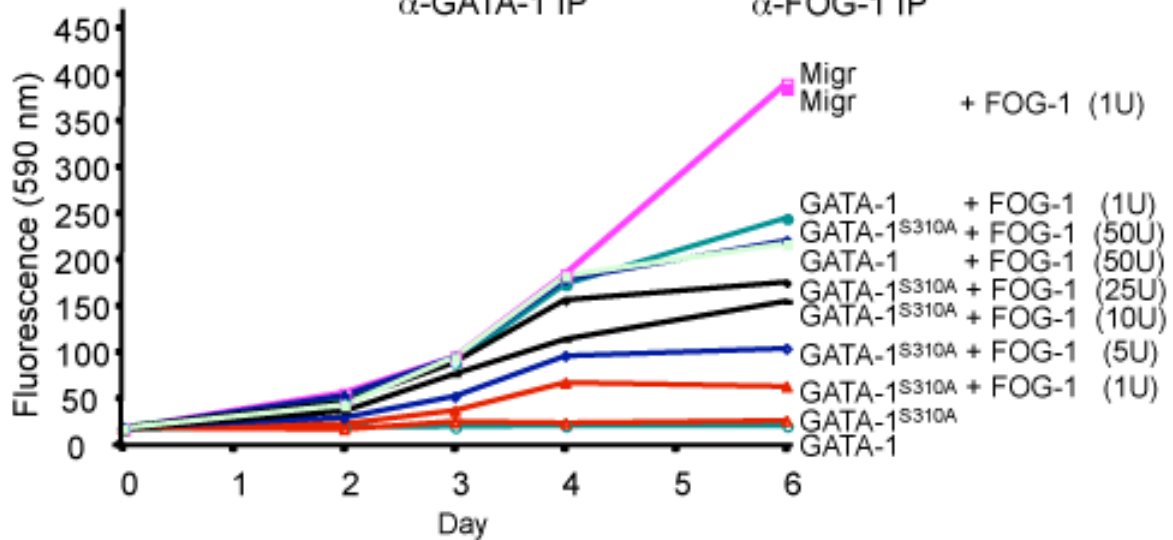

**C**

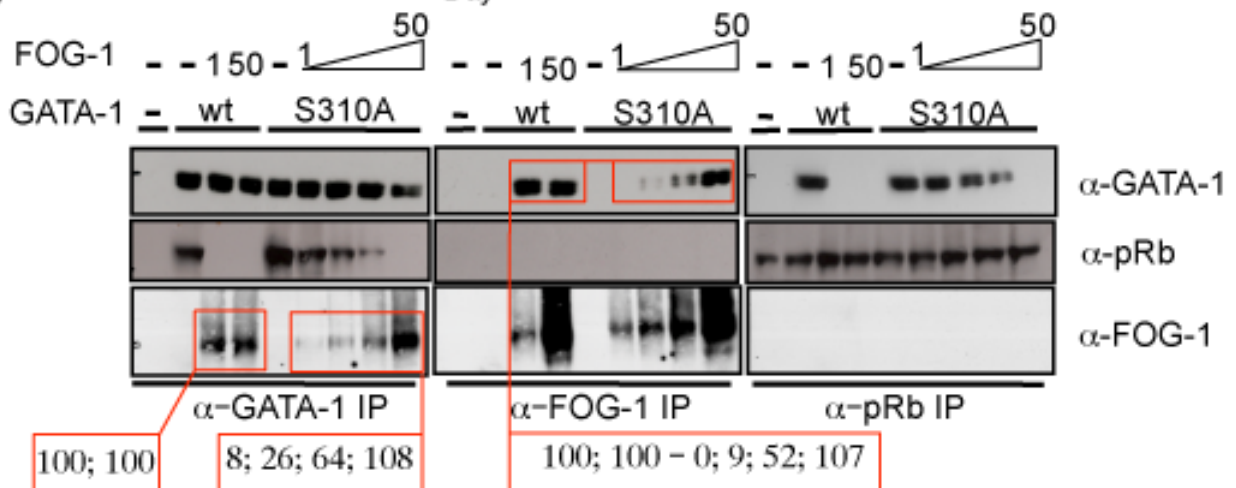

# Kadri et al Supplemental Figure S4

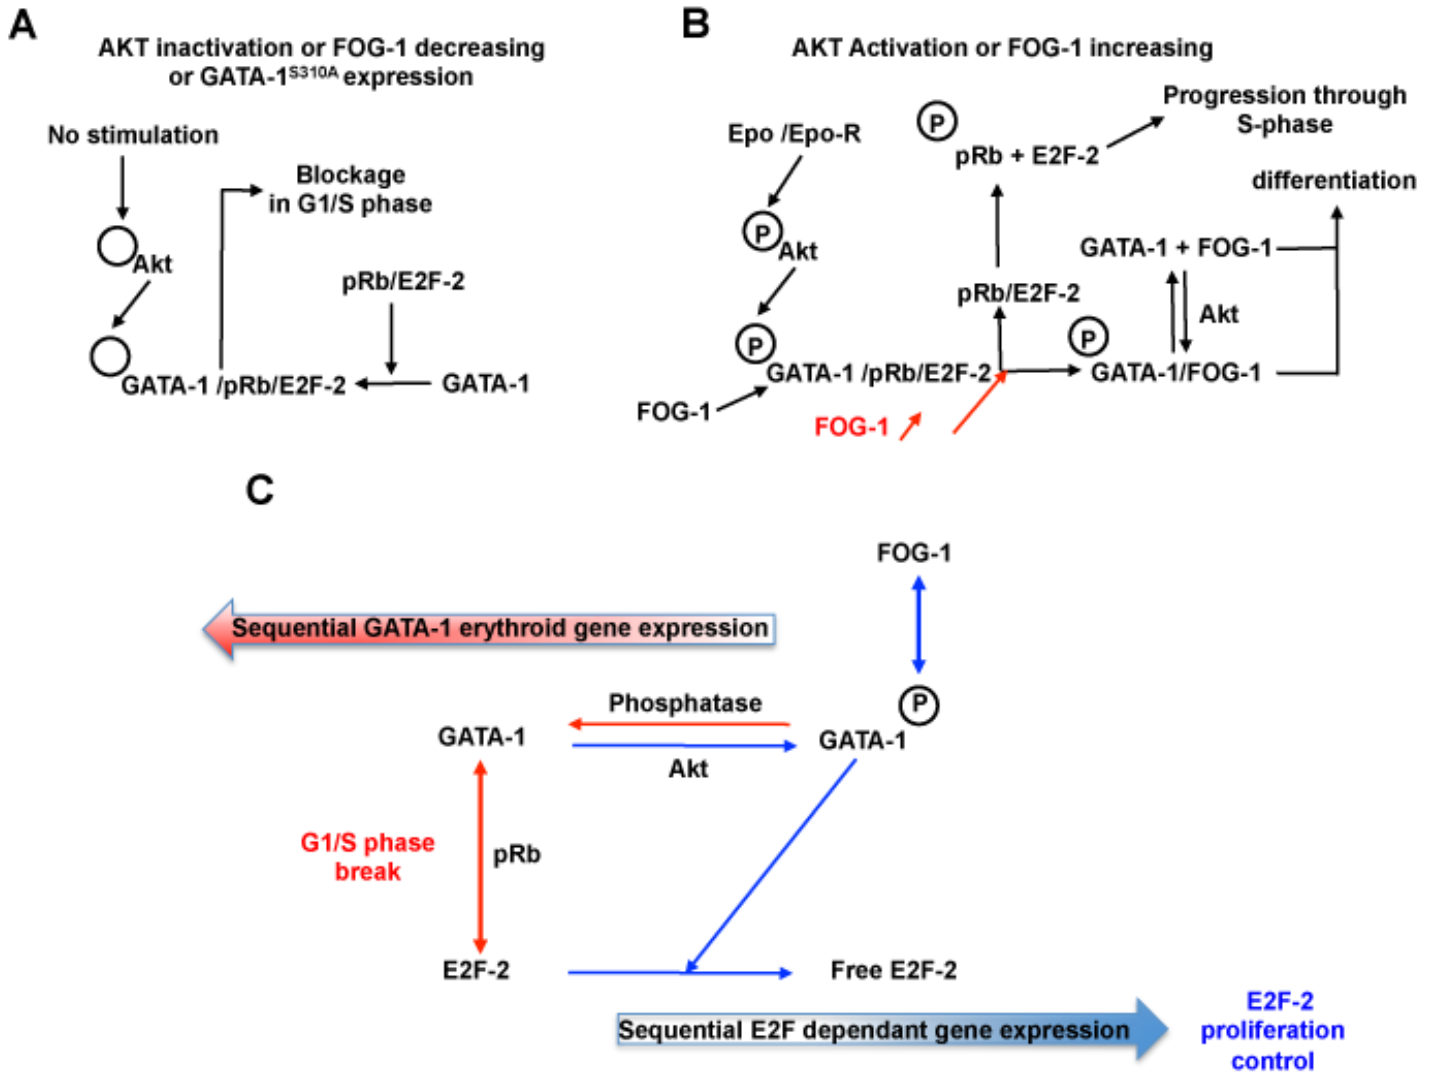

*Kadri et al Supplemental Figure S5*

**A**

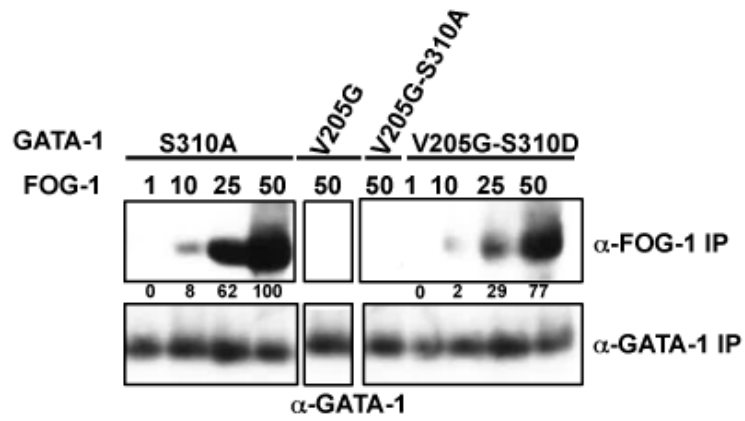

**B**

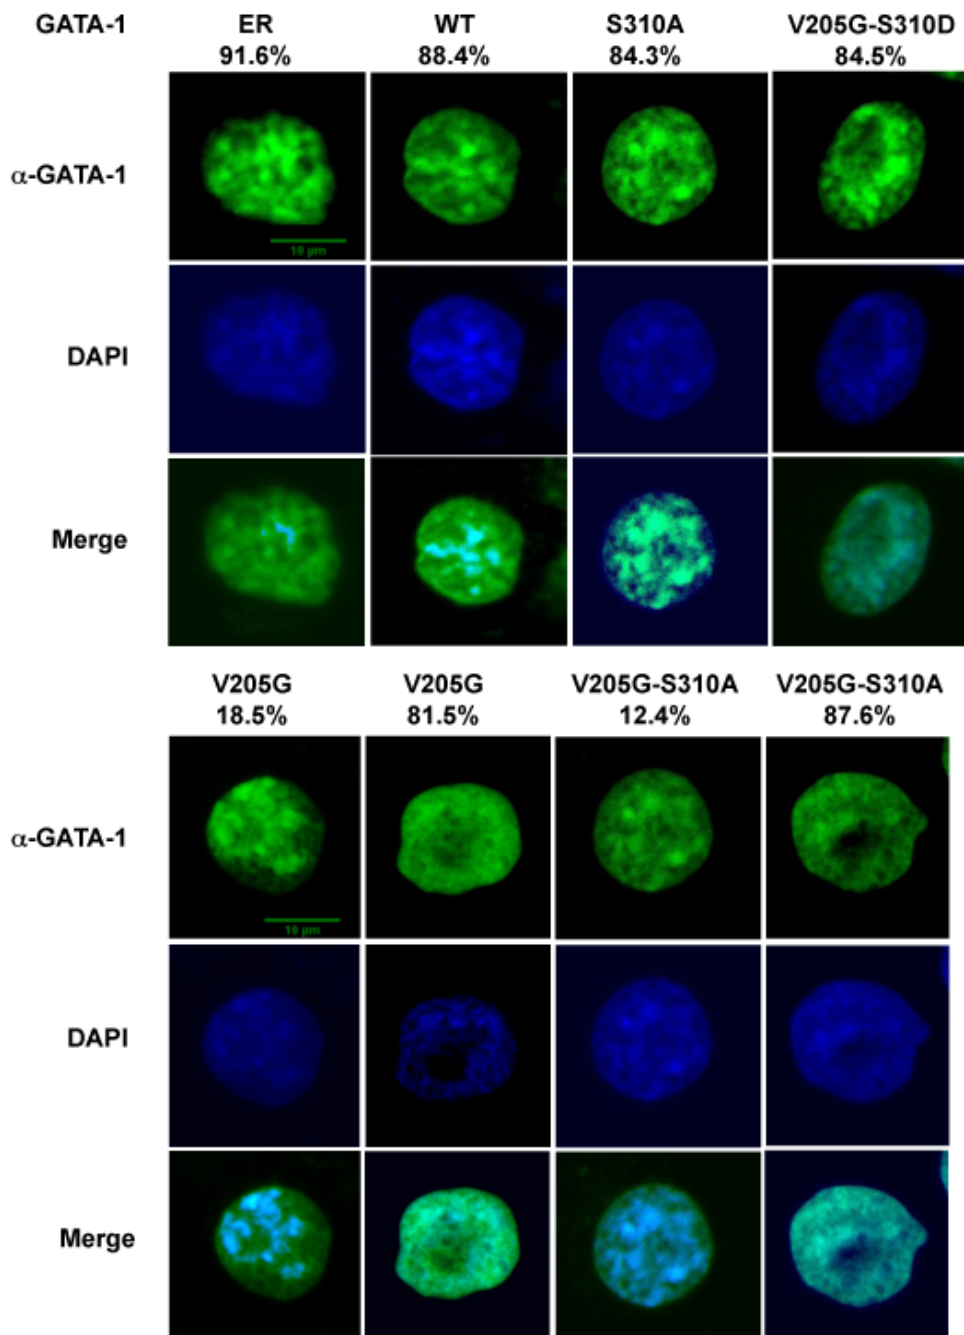

*Kadri et al Supplemental Figure S6*

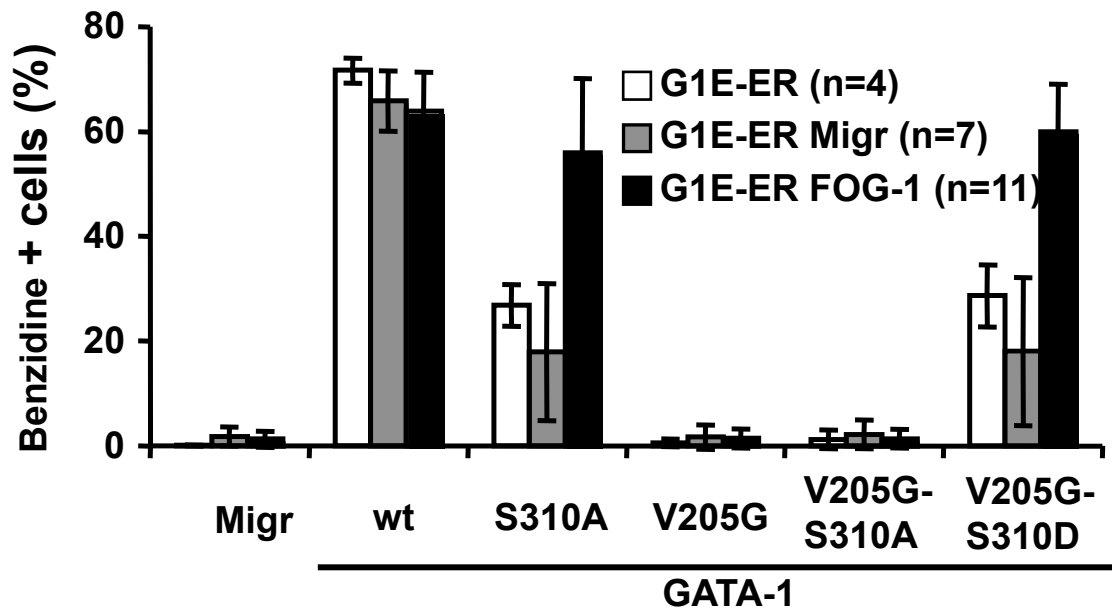

*Kadri et al Supplemental Figure S7*

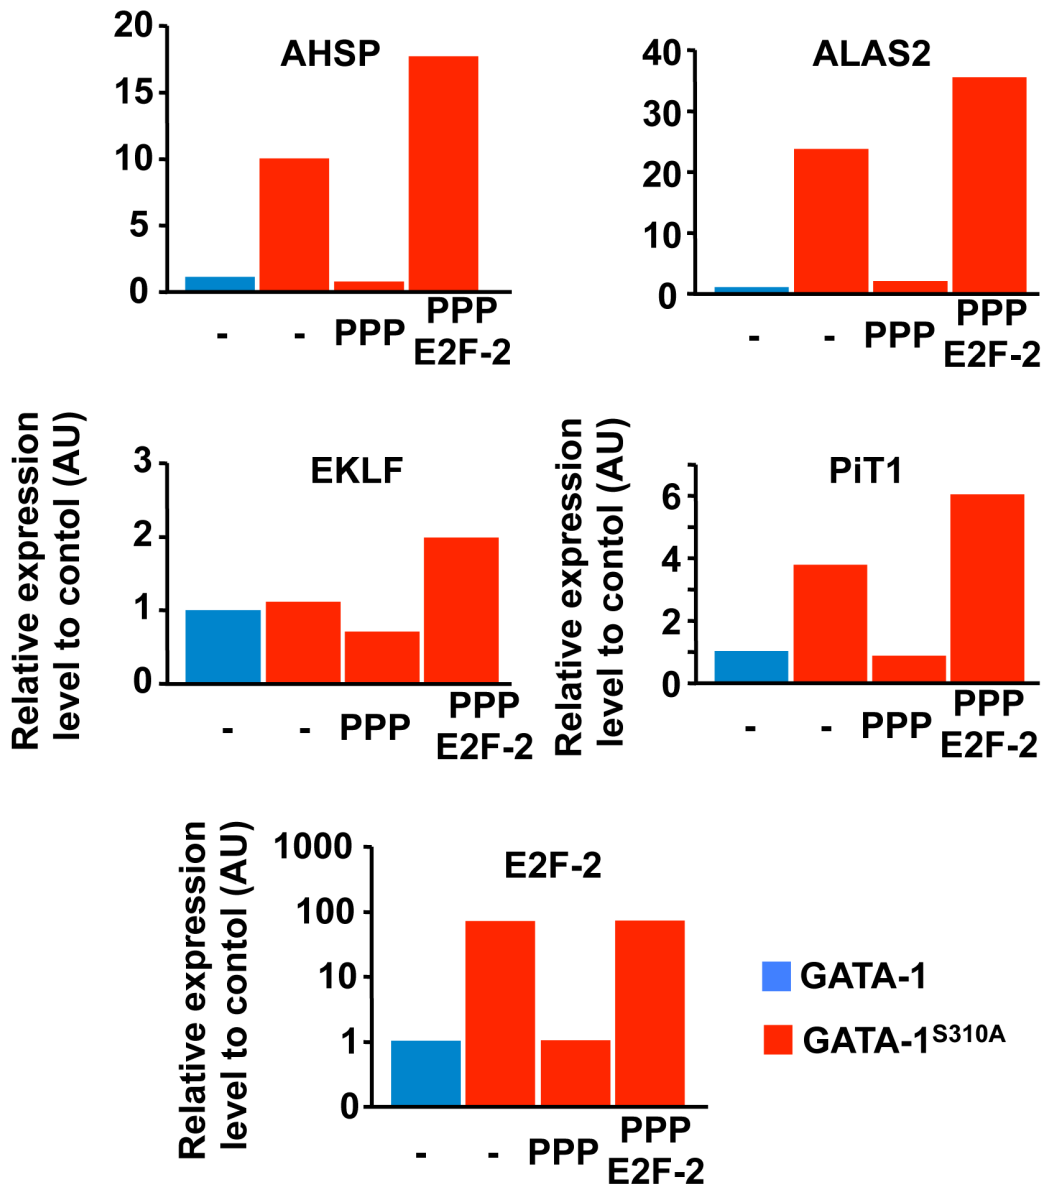

Supplement: supp_29.24.2603_Supp_Figures.pdf [file supp_29.24.2603_Supp_Figures.pdf]
